# Supplementary material
Source: PubMed Central journal article supplement (PMC1794283)
Supplement: pnas_0604851104_2.pdf [file pnas_0604851104_2.pdf]

## ABC-type Transport Systems

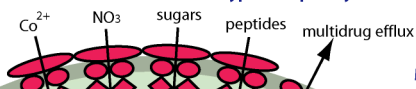

## Multi-Drug Efflux Permeases (MFS)

ArsB

As<sup>3+</sup>

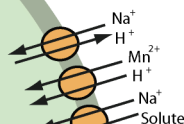

## Catabolic Functions

beta-lactamase  
 protease  
 lipases/esterase  
 alpha-amylase  
 beta-galactosidase  
 beta-oxidation (lipids)  
 xenobiotics

## Defense Mechanisms

DNA restriction/modification systems  
 superoxide dismutase  
 hydrogen peroxide reductase  
 cytochrome P450  
 mercuric reductase

## Cofactor Biosynthesis

cobalamin  
 heme  
 THF  
 pyridoxine  
 riboflavin  
 ubiquinone  
 pantothenate  
 coenzyme PQQ

## Embden-Meyerhoff Pathway

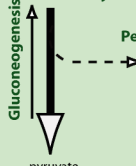

## Pentose Phosphate Pathway (partial)

## Protein Translocation

Sec-dependent  
 Sec-independent

## H<sup>+</sup>-transporting ATP synthase

$\text{H}^+$   $\text{H}^+$   $\text{H}^+$   $\text{H}^+$

heme-copper terminal oxidase

$\text{Fe}^{3+}$  sulfocyanin-mediated  
 ferrous iron oxidation?

bd-type quinol  
 oxidase

$\text{Fe}^{2+}$   
 $\text{Fe}^{2+}$

succinate dehydrogenase

NADH:ubiquinone dehydrogenase

## P-Type ATPases

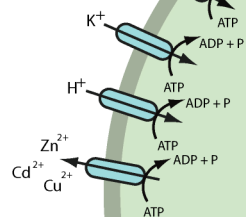

Formate Dehydrogenase

Formate

## Reductive Acetyl-CoA Pathway

(+THF)  $\text{CO}_2$   $\text{CO}$   $\text{Acetyl-CoA}$

(+CoA)  $\text{CO}$   $\text{Acetyl-CoA}$

macromolecular biosynthesis

$\text{NADPH}$

$\text{SO}_3^{2-}$   $\text{ADP} + \text{P}$   $\text{Sulfite Oxidase ?}$   $\text{ATP}$   $\text{SO}_4^{2-}$

$\text{NAD}^+$   $\text{NADH}$

## Formate Hydrogenlyase Complex

$\text{CO}_2 + \text{H}_2$

osmolyte

## Voltage-gated Channel

osmolyte

## Citric Acid Cycle

$\text{NAD}^+$   $\text{NADH}$

$\text{NAD}^+$   $\text{NADH}$
