# Supplementary material
Source: PubMed Central journal article supplement (PMC1794283)

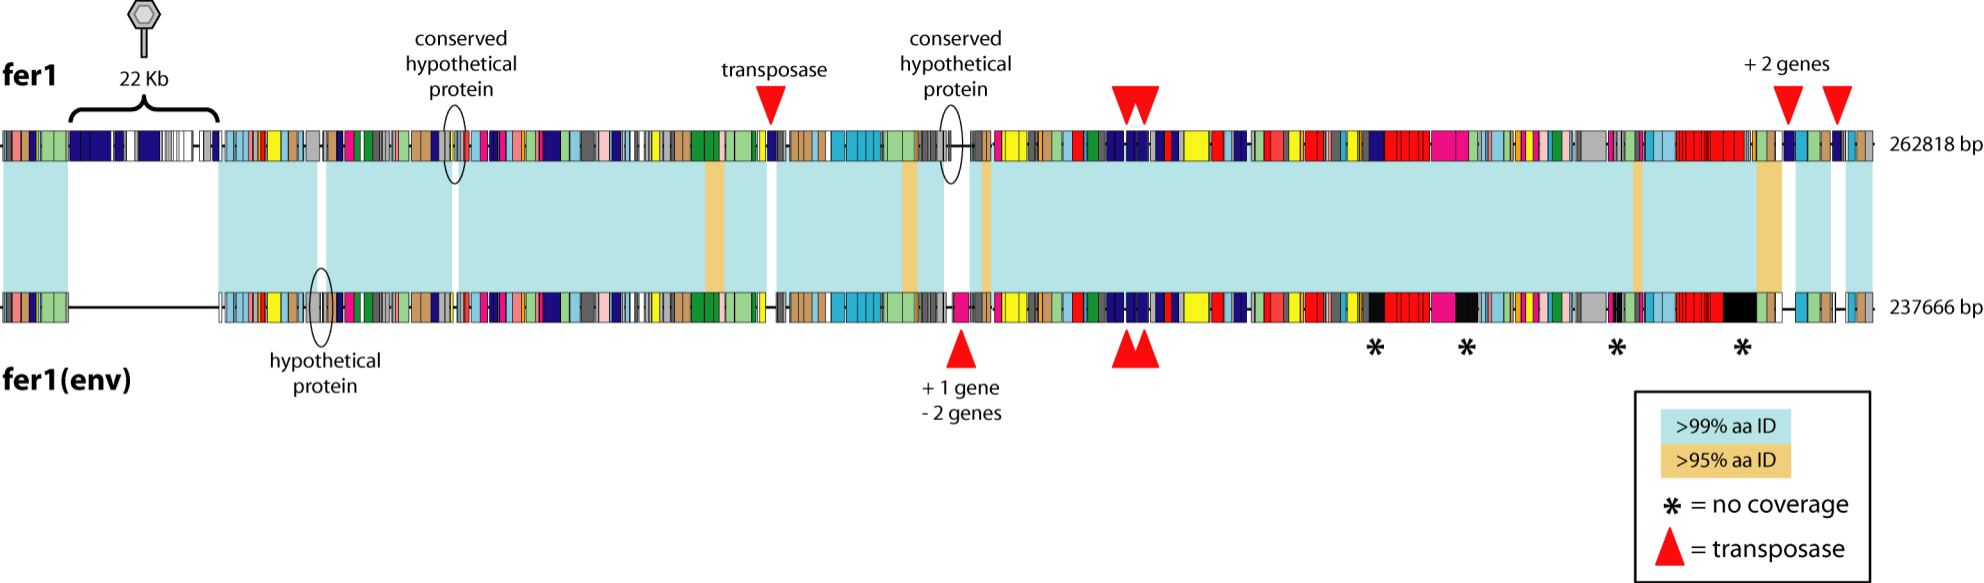

Supplement: pnas_0604851104_3.pdf [file pnas_0604851104_3.pdf]
