# Supplementary material
Source: PubMed Central journal article supplement (PMC1794283)
Supplement: pnas_0604851104_4.pdf [file pnas_0604851104_4.pdf]

fer1\_CDSs

1963

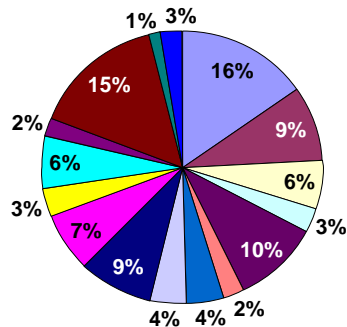

171

missing in fer1(env)

1792

found in fer1(env)

152

missing

19

gaps in coverage

homogeneous

545

heterogeneous

1247

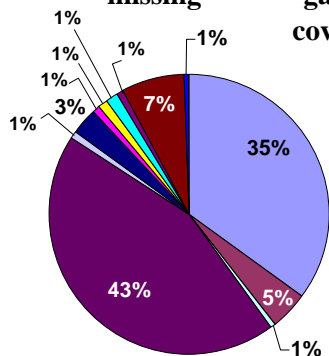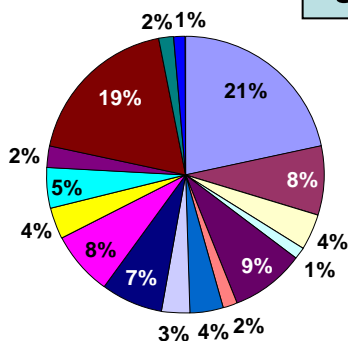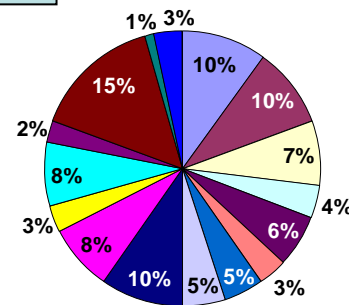

427

isolate-type sequence only

118

1 env-type sequence only

359

env-type sequence only

241

> 1 env-type sequence

1006

iso + env mixed

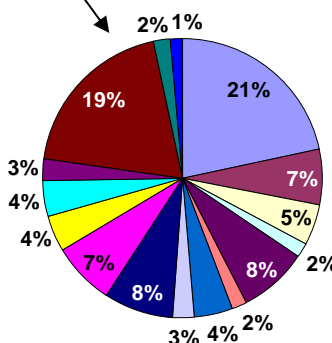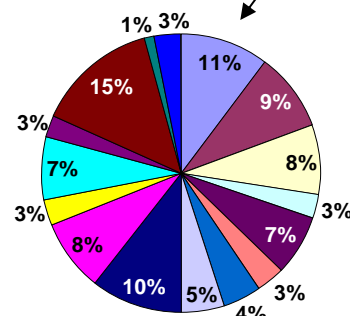

**Functional groups:**

Hypothetical protein

DNA replication / repair

Transport

Cellular envelope

General functional prediction only

Lipids

Translation

Conserved hypothetical

Energy metabolism

Cofactor biosynthesis

Regulation

Transcription

Intermediary metabolism

Cellular processes

Amino acid metabolism

Purines / pyrimidines
