# Supplementary material
Source: PubMed Central journal article supplement (PMC1794283)

A.

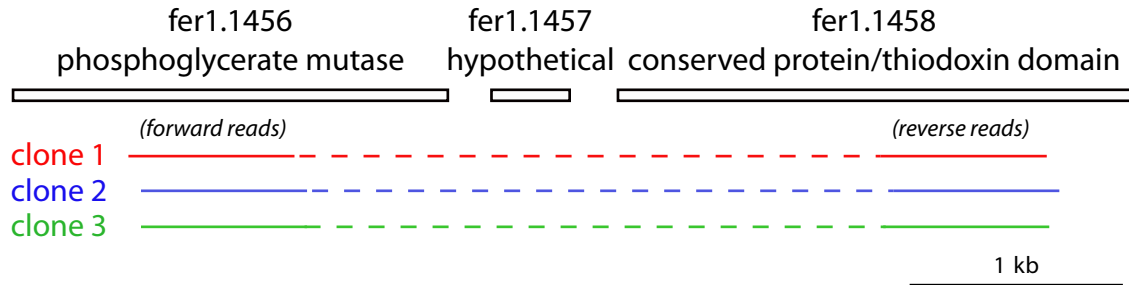

B.

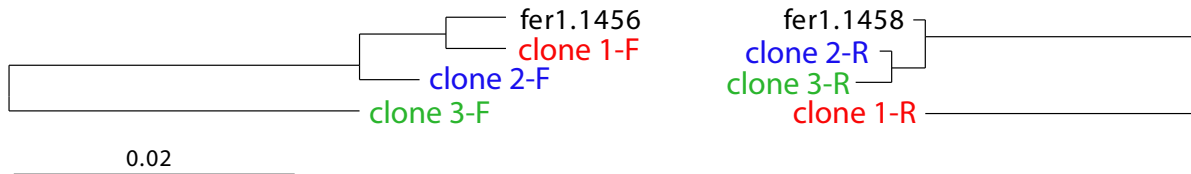

Supplement: pnas_0604851104_5.pdf [file pnas_0604851104_5.pdf]
