# Supplementary material
Source: PubMed Central journal article supplement (PMC1794283)
Supplement: pnas_0604851104_6.pdf [file pnas_0604851104_6.pdf]

# glycosyltransferase

|             |     |                                               |
|-------------|-----|-----------------------------------------------|
| QUERY       | 121 | aagtcaacaactgagcaatcacttttcacggcaattatacgaata |
| fer1.144c   | 121 | .....                                         |
| XYG7465.g2  | 215 | .....                                         |
| XYD1690.g1  | 200 | .....                                         |
| XYG64953.g1 | 198 | .....t.t.a.....a.c.....g.....                 |
| XYG17515.g3 | 374 | .....t.t.a.....a.c.....g.....                 |

|             |     |                                               |
|-------------|-----|-----------------------------------------------|
| QUERY       | 167 | attattgttaaaaacttccgggatacaaatattgacgcttttgca |
| fer1.144c   | 121 | .....                                         |
| XYG7465.g2  | 261 | .....                                         |
| XYD1690.g1  | 246 | .....                                         |
| XYD64953.g1 | 244 | .....aa.....t....c.g                          |
| XYG17515.g3 | 374 | .....aa.....t....c.g                          |

|             |     |                                               |
|-------------|-----|-----------------------------------------------|
| QUERY       | 211 | gaagagtataatgtaattaatatttatagtgaaaatgaaacgctc |
| fer1.144c   | 211 | .....                                         |
| XYG7465.g2  | 365 | .....                                         |
| XYD1690.g1  | 250 | .....c.....a...a...                           |
| XYG64953.g1 | 348 | .....c.c....t....g.....c.....a...a...         |
| XYG17515.g3 | 524 | .....c.c....t....g.....c.....a...a...         |

|             |     |                                               |
|-------------|-----|-----------------------------------------------|
| QUERY       | 257 | tctggaaagataatagaagcaatcgggatcgccagggggaatatt |
| fer1.144c   | 257 | .....                                         |
| XYG7465.g2  | 411 | .....                                         |
| XYD1690.g1  | 296 | .....                                         |
| XYG64953.g1 | 394 | .....                                         |
| XYG17515.g3 | 570 | ..                                            |
