# Supplementary material
Source: PubMed Central journal article supplement (PMC1794283)
Supplement: pnas_0604851104_7.pdf [file pnas_0604851104_7.pdf]

**Table 3.** General features of the *F. acidarmanus* fer1 genome.

---

|                            |                    |
|----------------------------|--------------------|
| Genome size                | 1,935,211 bp       |
| Coding region, %           | 88.8               |
| GC content %               | 37.56              |
| Predicted ORFs             | 1963               |
| Functional predictions     | 1363 (69.4%)       |
| Conserved hypotheticals    | 301 (15.3%)        |
| Hypothetical protein       | 299 (15.2%)        |
| ORFs involved in transport | 168                |
| Transposase-related        | 94                 |
| rRNAs                      | 1 5S; 1 16S; 1 23S |
| tRNAs                      | 44                 |

---
