# Supplementary material
Source: PubMed Central journal article supplement (PMC1794283)
Supplement: pnas_0604851104_8.pdf [file pnas_0604851104_8.pdf]

**Table 4.** Genes unique to fer1 and fer1(env).

| <b>fer1</b> | <b>ANNOTATION</b>                                                                 |
|-------------|-----------------------------------------------------------------------------------|
| FA01        | hypothetical protein                                                              |
| FA02        | hypothetical protein                                                              |
| FA03c       | transposase                                                                       |
| FA04c       | conserved hypothetical protein predicted to be involved in DNA repair             |
| FA05c       | uncharacterized protein predicted to be involved in DNA repair                    |
| FA06c       | RecB family exonuclease                                                           |
| FA07c       | predicted helicase                                                                |
| FA08c       | conserved hypothetical protein                                                    |
| FA09c       | uncharacterized protein predicted to be involved in DNA repair                    |
| FA10c       | hypothetical protein                                                              |
| FA11c       | uncharacterized protein predicted to be involved in DNA repair (RAMP superfamily) |
| FA12        | superfamily I DNA/RNA helicase                                                    |
| FA13        | DNA or RNA helicase of superfamily II                                             |
| FA14        | ATPase involved in DNA repair/chromosome segregation                              |
| FA15        | hypothetical protein                                                              |
| FA36        | conserved hypothetical protein                                                    |
| FA37        | hypothetical protein                                                              |
| FA61        | transposase                                                                       |
| FA77        | transposase                                                                       |
| FA119c      | transposon-encoded protein                                                        |
| FA120       | transposase                                                                       |
| FA128c      | transposase                                                                       |
| FA187       | transposase                                                                       |
| FA437       | transposase                                                                       |
| FA438c      | transposase                                                                       |
| FA465c      | hypothetical protein (MazF growth inhibitor-related)                              |
| FA466c      | conserved hypothetical protein                                                    |
| FA477c      | transposase (DDE domain)                                                          |
| FA569c      | predicted nucleic acid-binding protein (PIN domain)                               |
| FA570c      | conserved hypothetical protein                                                    |
| FA571       | integrase/recombinase                                                             |
| FA572       | hypothetical protein                                                              |
| FA573       | hypothetical protein                                                              |
| FA578c      | hypothetical protein                                                              |
| FA579       | integrase/recombinase                                                             |
| FA580       | conserved hypothetical protein                                                    |
| FA581c      | galactose mutarotase-related protein                                              |
| FA582c      | probable selenocysteine synthase (seryl-tRNA <sup>Ser</sup> selenium transferase) |
| FA583c      | short-chain alcohol dehydrogenase                                                 |
| FA584c      | amino acid transporter                                                            |
| FA585c      | predicted DNA-binding protein                                                     |
| FA586c      | N-carbamoyl-L-amino acid amidohydrolase                                           |
| FA589c      | hypothetical protein                                                              |
| FA590       | hypothetical protein                                                              |
| FA591       | hypothetical protein                                                              |
| FA592       | possible inactivated transposase                                                  |
| FA593       | permease (major facilitator superfamily)                                          |
| FA594       | dihydroorotase-related cyclic amidohydrolase                                      |
| FA595       | benzoylformate decarboxylase-related thiamine pyrophosphate-requiring enzyme      |
| FA596c      | hypothetical protein                                                              |
| FA597c      | hypothetical protein                                                              |

|         |                                                                        |
|---------|------------------------------------------------------------------------|
| FA598c  | conserved hypothetical protein                                         |
| FA677c  | transposase                                                            |
| FA678c  | transposase                                                            |
| FA750c  | possible inactivated transposase                                       |
| FA751c  | transposase                                                            |
| FA772   | transposase                                                            |
| FA774   | hypothetical membrane protein                                          |
| FA791   | probable transposase                                                   |
| FA792   | transposase                                                            |
| FA793   | transposase                                                            |
| FA794   | transposase (DDE domain)                                               |
| FA797   | conserved hypothetical protein (possible nucleic acid-binding protein) |
| FA872c  | transposase                                                            |
| FA876c  | inactivated transposase                                                |
| FA877c  | transposase                                                            |
| FA878c  | hypothetical membrane protein; possible permease                       |
| FA879c  | transposase                                                            |
| FA880c  | transposase                                                            |
| FA1094c | transposase                                                            |
| FA1194  | hypothetical membrane protein                                          |
| FA1195  | hypothetical protein                                                   |
| FA1196  | hypothetical protein                                                   |
| FA1197  | hypothetical membrane protein                                          |
| FA1198  | hypothetical membrane protein                                          |
| FA1207c | metabolite transporter                                                 |
| FA1209c | predicted metal-dependent hydrolase related to alanyl-tRNA synthetase  |
| FA1210c | tRNA-pseudouridine synthase I-related protein                          |
| FA1211  | possible transcriptional regulator                                     |
| FA1220  | conserved hypothetical protein                                         |
| FA1221  | conserved hypothetical protein possibly involved in DNA repair         |
| FA1222  | conserved hypothetical protein possibly involved in DNA repair         |
| FA1223  | predicted helicase                                                     |
| FA1224  | predicted RecB family exonuclease (truncated by transposon insertion)  |
| FA1225c | transposon-encoded protein                                             |
| FA1226  | transposase                                                            |
| FA1227  | predicted RecB family exonuclease (truncated by transposon insertion)  |
| FA1228  | uncharacterized protein predicted to be involved in DNA repair         |
| FA1229  | conserved hypothetical protein possibly involved in DNA repair         |
| FA1230  | hypothetical protein                                                   |
| FA1231c | probable inactivated transposase                                       |
| FA1232c | probable inactivated transposase                                       |
| FA1233c | conserved hypothetical protein                                         |
| FA1234  | predicted membrane-associated protease with chaperone function         |
| FA1239c | transposase                                                            |
| FA1240  | transposon-encoded protein                                             |
| FA1242c | type I restriction-modification enzyme, M subunit                      |
| FA1243c | Co/Zn/Cd efflux system component                                       |
| FA1244c | hypothetical membrane protein                                          |
| FA1245c | hypothetical protein                                                   |
| FA1246c | hypothetical protein                                                   |
| FA1247c | hypothetical protein                                                   |
| FA1248c | transposase                                                            |
| FA1249  | possible multi-drug efflux permease                                    |
| FA1283c | transposase/integrase                                                  |

|         |                                                             |
|---------|-------------------------------------------------------------|
| FA1293  | hypothetical protein                                        |
| FA1324c | transposase                                                 |
| FA1325  | transposon-encoded protein                                  |
| FA1425  | integrase                                                   |
| FA1426c | hypothetical protein                                        |
| FA1427c | hypothetical protein                                        |
| FA1428  | hypothetical protein                                        |
| FA1429  | hypothetical protein                                        |
| FA1430  | possible phage-related DNA primase/helicase (ATPase domain) |
| FA1431  | hypothetical protein                                        |
| FA1432  | hypothetical protein                                        |
| FA1433  | hypothetical protein                                        |
| FA1434  | hypothetical protein                                        |
| FA1435  | hypothetical protein                                        |
| FA1436  | hypothetical protein                                        |
| FA1437  | hypothetical protein                                        |
| FA1438  | hypothetical protein                                        |
| FA1439  | hypothetical protein                                        |
| FA1440  | hypothetical protein                                        |
| FA1441  | hypothetical protein                                        |
| FA1442  | hypothetical protein (Zot-related)                          |
| FA1443  | hypothetical protein                                        |
| FA1444  | possible phage integrase                                    |
| FA1445c | conserved hypothetical membrane protein                     |
| FA1446  | site-specific DNA methylase                                 |
| FA1447  | hypothetical protein                                        |
| FA1682  | transposase                                                 |
| FA1703  | transposase                                                 |
| FA1704  | transposase                                                 |
| FA1735c | probable transposon-encoded protein                         |
| FA1736  | transposase                                                 |
| FA1783  | transposase                                                 |
| FA1787  | transposase (integrase core domain)                         |
| FA1797  | probable glycosyltransferase                                |
| FA1855  | transposase                                                 |
| FA1941c | hypothetical protein                                        |
| FA1942c | hypothetical protein                                        |
| FA1943  | transposase                                                 |
| FA1944c | hypothetical protein                                        |
| FA1945c | predicted ATPase (possible endonuclease)                    |
| FA1946  | possible transcriptional regulator                          |
| FA1947  | conserved hypothetical protein                              |
| FA1948  | hypothetical protein                                        |
| FA1949c | hypothetical protein                                        |
| FA1950c | hypothetical protein                                        |
| FA1958  | hypothetical protein                                        |
| FA1959  | transposase                                                 |

**fer1(env)****ANNOTATION**

|            |                                                              |
|------------|--------------------------------------------------------------|
| env_52_2   | mrr restriction system protein                               |
| env_58_28  | hypothetical protein                                         |
| env_63_19  | conserved hypothetical membrane protein                      |
| env_65_4   | hypothetical protein (possible signal peptidase)             |
| env_65_5   | hypothetical membrane protein                                |
| env_65_6   | hypothetical protein                                         |
| env_65_7   | hypothetical protein                                         |
| env_139_4  | predicted phosphate transport protein                        |
| env_148_14 | predicted inactivated transposase                            |
| env_149_4  | hypothetical protein                                         |
| env_184_16 | hypothetical protein                                         |
| env_243_11 | hypothetical protein                                         |
| env_246_10 | transposase                                                  |
| env_246_9  | transposase                                                  |
| env_249_13 | conserved hypothetical protein                               |
| env_249_14 | hypothetical protein                                         |
| env_249_6  | hypothetical protein                                         |
| env_262_6  | Type II restriction-modification methylase                   |
| env_262_7  | Type II restriction-modification endonuclease                |
| env_342_1  | ABC-type sugar transport system, substrate-binding component |
| env_354_1  | hypothetical protein                                         |
| env_419_10 | predicted inactivated transposase                            |
| env_442_2  | integrase/recombinase                                        |
| env_442_5  | hypothetical protein                                         |
| env_442_6  | hypothetical protein                                         |
| env_450_5  | conserved hypothetical protein                               |
| env_450_6  | hypothetical protein                                         |
| env_476_1  | hypothetical protein                                         |
| env_476_2  | hypothetical protein                                         |
| env_580_5  | hypothetical protein                                         |
| env_588_4  | hypothetical protein                                         |
| env_588_6  | hypothetical protein                                         |
| env_636_3  | hypothetical protein                                         |
| env_636_4  | hypothetical protein                                         |
| env_636_5  | hypothetical protein                                         |
| env_663_5  | conserved hypothetical protein (possible ATPase)             |
| env_701_2  | hypothetical protein                                         |
| env_711_6  | integrase/recombinase                                        |
| env_722_3  | hypothetical protein                                         |
| env_722_5  | possible glycosyltransferase                                 |
| env_833_3  | hypothetical protein                                         |
| env_848_4  | possible glycosyltransferase                                 |
| env_932_3  | hypothetical protein                                         |
| env_986_2  | ABC-type sugar transport system, substrate-binding component |
| env_1120_3 | predicted protease                                           |
