# Supplementary material
Source: PubMed Central journal article supplement (PMC1794283)
Supplement: pnas_0604851104_9.pdf [file pnas_0604851104_9.pdf]

**Table 5.** IS families in the *F. acidarmanus* fer1 and fer1(env) genomes.

| <i>IS Family</i> | <i># of elements in genome</i> |                  | <i>fer1:fer1(env)</i> |
|------------------|--------------------------------|------------------|-----------------------|
|                  | <i>fer1</i>                    | <i>fer1(env)</i> |                       |
| IS4              | 19                             | 7                | 2.7                   |
| IS605            | 17                             | 10               | 1.7                   |
| IS256            | 11                             | 6                | 1.8                   |
| IS3              | 9                              | 2                | 4.5                   |
| ISNCY            | 8                              | 4                | 2                     |
| IS481            | 8                              | 9                | 0.9                   |
| IS5              | 8                              | 1                | 8                     |
| IS110            | 5                              | 4                | 1.3                   |
| IS982            | 4                              | 0                | -                     |
| IS630            | 1                              | 2                | 0.5                   |
| novel            | 4                              | 6                | 0.7                   |
|                  | 94                             | 51               |                       |
|                  | total                          | total            |                       |
